# Supplementary material for: Assessment of Inter-Laboratory Differences in SARS-CoV-2 Consensus Genome Assemblies between Public Health Laboratories in Australia
Source: MDPI journal article supplement (doi:10.3390/v14020185), 2022-01-19
Supplement: s1 [file s1]

UF Bootstrap support (BP)

- BP = 100
- 95 ≤ BP < 99
- 80 ≤ BP < 95
- BP < 80

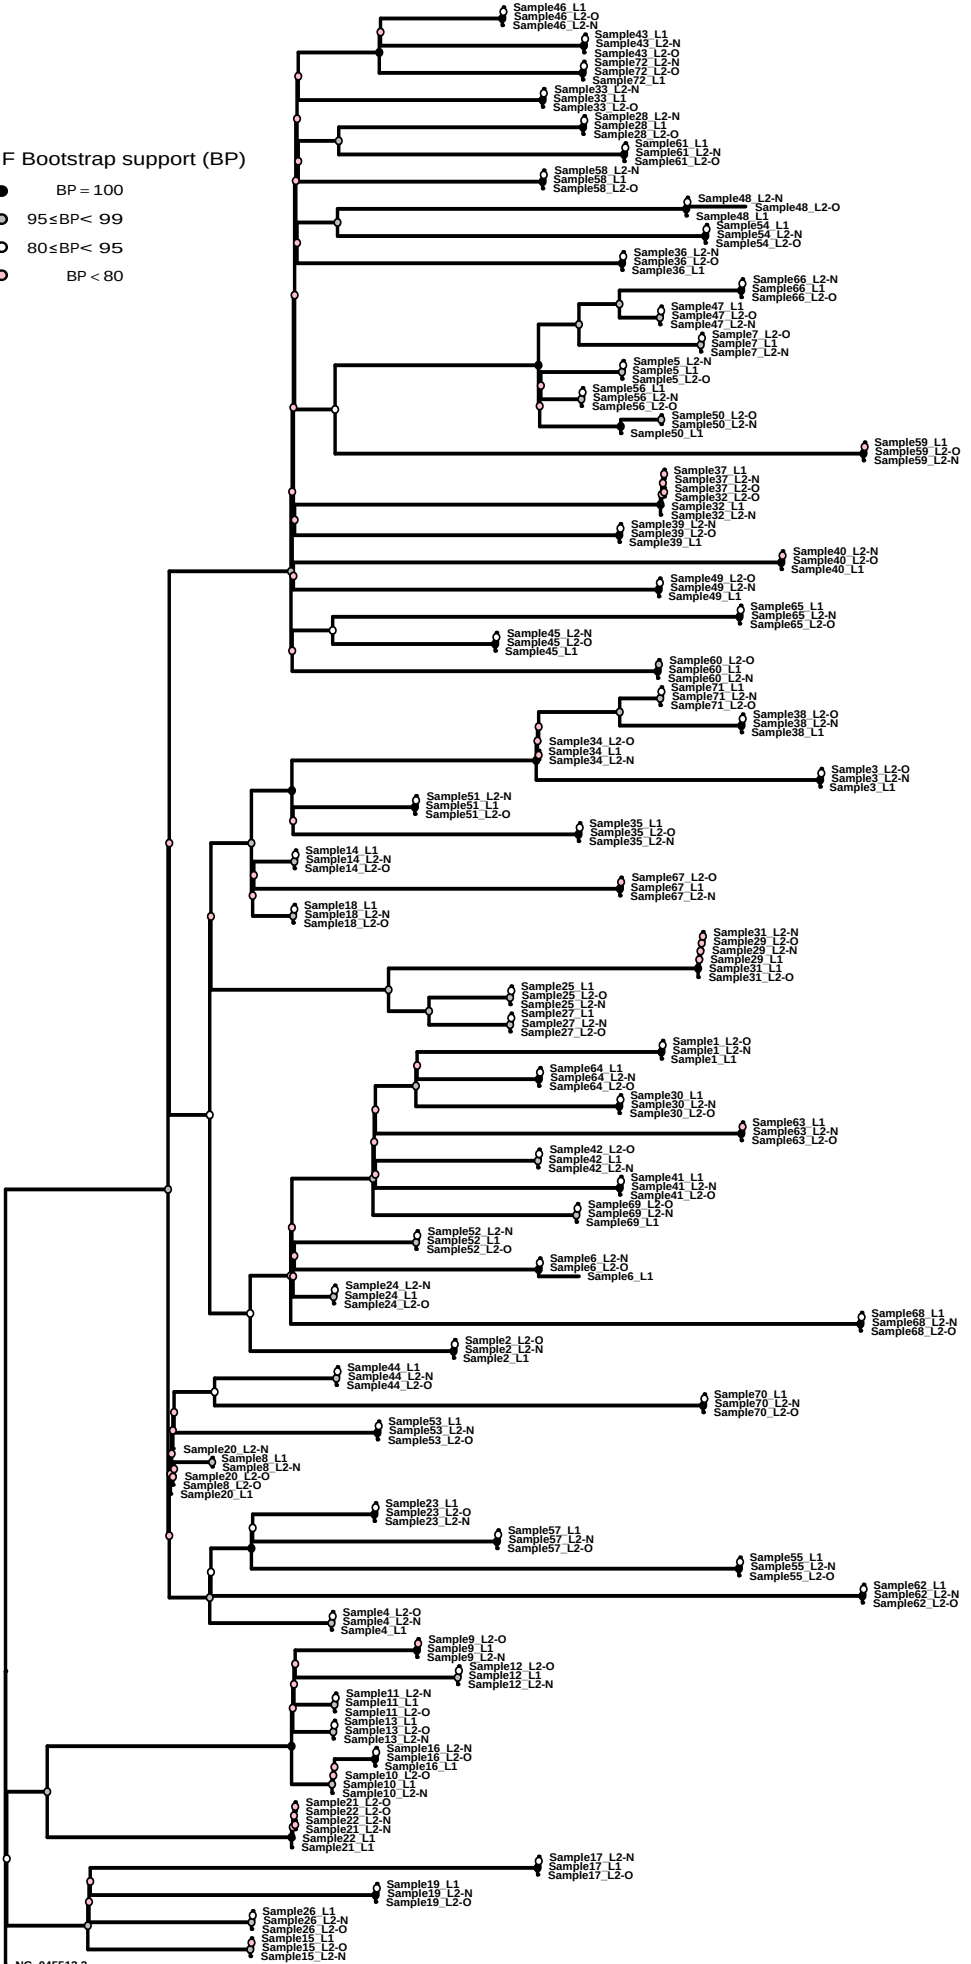

NC\_045512.2
